# Supplementary material for: Interrelationship of rotavirus infection and Creatine Kinase-MB isoenzyme levels in children hospitalized with acute gastroenteritis in Guangzhou, China, 2012–2015
Source: PubMed Central journal article supplement (PMC5550499; doi:10.1038/s41598-017-07636-4), 2017-08-09
Supplement: 41598_2017_7636_MOESM1_ESM.pdf [file 41598_2017_7636_MOESM1_ESM.pdf]

## Title page

**Title: Interrelationship of rotavirus infection and creatine kinase-MB isoenzyme levels in children hospitalized with acute gastroenteritis in Guangzhou, China, 2012-2015**

**Authors:** Jianbin Zheng<sup>1,#</sup>, Haiqing Zheng<sup>2,#</sup>, Ramit Kumar Gupta<sup>3</sup>, Huixian Li<sup>2</sup>, Hui Shi<sup>2</sup>, Liyan Pan<sup>2</sup>, Sitang Gong<sup>4,\*</sup> & Huiying Liang<sup>2,\*</sup>

**Affiliations:**

<sup>1</sup> Pediatric Intensive Care Unit, Guangzhou Women and Children's Medical Center, Guangzhou Medical University, Guangzhou, China;

<sup>2</sup> Institute of Pediatrics, Guangzhou Women and Children's Medical Center, Guangzhou Medical University, Guangzhou, China;

<sup>3</sup> Cardiac Intensive Care Unit, Heart Center, Guangzhou Women and Children's Medical Center, Guangzhou Medical University, Guangzhou, China;

<sup>4</sup> Department of Gastroenterology, Guangzhou Women and Children's Medical Center, Guangzhou Medical University, Guangzhou, China;

Correspondence and requests for materials should be addressed to H-Y. L ([lianghuiying@hotmail.com](mailto:lianghuiying@hotmail.com)) or S. G ([sitanggong@126.com](mailto:sitanggong@126.com)).

Address: No.9 Jinsui Road, Zhujiang Newtown, Tianhe District, Guangzhou 510623, China.

J.Z and H.Z contributed equally to this manuscript.

H-Y.L and S.G contributed equally to this manuscript.

| <b>Variables</b>                     | <b><math>\beta</math></b> | <b>SE</b> | <b>OR</b> | <b>95%CI</b> | <b>P value</b> |
|--------------------------------------|---------------------------|-----------|-----------|--------------|----------------|
| Age(months)                          | -0.01                     | 0.01      | 0.99      | 0.98-0.99    | <0.01          |
| Sex(female vs. male)                 | 0.19                      | 0.52      | 1.21      | 0.74-0.91    | <0.01          |
| Season of admission (vs. winter)     |                           |           |           |              |                |
| Spring                               | -0.17                     | 0.08      | 0.84      | 0.72-0.98    | 0.03           |
| Summer                               | -0.36                     | 0.07      | 0.69      | 0.61-0.81    | <0.01          |
| Autumn                               | -0.14                     | 0.06      | 0.87      | 0.78-0.98    | 0.02           |
| RV infection (positive vs. negative) | 0.25                      | 0.05      | 1.28      | 1.15-1.41    | <0.01          |
| Weight (Kg)                          | 0.06                      | 0.01      | 1.06      | 1.03-1.09    | <0.01          |
| Constant                             | 3.56                      | 0.10      | 35.16     | 28.93-43.03  | <0.01          |

Supplementary Table S1. Relationship between RV-positive and RV-negative children and logarithm of CK-MB according to the multivariate linear regression analysis.

SE, standard error; CI, confidence interval; OR, odds ratio; RV, rotavirus; CK-MB, Creatine Kinase-MB.

| <b>Variables</b>                     | <b><math>\beta</math></b> | <b>SE</b> | <b>OR</b> | <b>95%CI</b> | <b>P value</b> |
|--------------------------------------|---------------------------|-----------|-----------|--------------|----------------|
| Age(months)                          | -0.01                     | 0.01      | 0.99      | 0.98-1.00    | 0.04           |
| Sex(female vs. male)                 | -0.11                     | 0.07      | 0.89      | 0.78-1.02    | 0.10           |
| Season of admission (vs. winter)     |                           |           |           |              |                |
| Spring                               | -0.03                     | 0.11      | 0.97      | 0.79-1.20    | 0.81           |
| Summer                               | -0.25                     | 0.01      | 0.78      | 0.64-0.94    | 0.01           |
| Autumn                               | -0.09                     | 0.08      | 0.91      | 0.79-1.06    | 0.24           |
| RV infection (positive vs. negative) | 0.14                      | 0.07      | 1.15      | 1.01-1.32    | 0.04           |
| Weight (Kg)                          | 0.07                      | 0.02      | 1.07      | 1.03-1.11    | <0.01          |
| Constant                             | 4.32                      | 0.14      | 75.19     | 57.39-98.19  | 4.32           |

Supplementary Table S2. Relationship between RV-positive and RV-negative children and logarithm of CK according to the multivariate linear regression analysis.

SE, standard error; CI, confidence interval; OR, odds ratio; RV, rotavirus; CK, Creatine Kinase.

| Age (months) | RV-positive |        |      | RV-negative |       |      |
|--------------|-------------|--------|------|-------------|-------|------|
|              | n           | GM     | GSD  | n           | GM    | GSD  |
| 1            | 7           | 31.09  | 1.84 | 22          | 27.20 | 1.78 |
| 2            | 16          | 48.97  | 2.57 | 47          | 33.01 | 1.92 |
| 3            | 12          | 41.72  | 1.91 | 27          | 31.99 | 2.98 |
| 4            | 11          | 27.99  | 1.80 | 28          | 28.02 | 1.47 |
| 5            | 23          | 35.67  | 1.52 | 35          | 31.28 | 1.82 |
| 6            | 21          | 39.01  | 2.39 | 18          | 33.59 | 2.02 |
| 7            | 24          | 52.72  | 1.82 | 25          | 39.16 | 1.86 |
| 8            | 21          | 53.79* | 2.37 | 24          | 34.32 | 1.77 |
| 9            | 23          | 64.33# | 1.88 | 27          | 35.39 | 1.88 |
| 10           | 35          | 57.63* | 1.97 | 19          | 37.71 | 1.72 |
| 11           | 25          | 64.14* | 1.77 | 22          | 46.33 | 1.66 |
| 12           | 34          | 48.32  | 1.75 | 32          | 51.71 | 1.94 |
| 13           | 23          | 67.69  | 2.45 | 19          | 40.61 | 2.09 |
| 14           | 31          | 57.17  | 1.86 | 25          | 47.13 | 2.43 |
| 15           | 25          | 53.57  | 2.07 | 22          | 44.74 | 1.78 |
| 16           | 32          | 60.38  | 1.86 | 17          | 57.28 | 1.95 |
| 17           | 32          | 55.81  | 2.05 | 13          | 45.69 | 2.07 |
| 18           | 18          | 64.70  | 1.93 | 9           | 44.34 | 1.80 |
| 19           | 12          | 60.09  | 1.93 | 7           | 45.69 | 1.95 |
| 20           | 17          | 53.57* | 1.95 | 9           | 31.91 | 1.57 |
| 21           | 17          | 84.18* | 1.96 | 7           | 45.02 | 1.77 |
| 22           | 7           | 69.19  | 2.34 | 7           | 49.99 | 1.64 |
| 23           | 15          | 38.94  | 2.38 | 6           | 24.72 | 1.76 |
| 24           | 9           | 43.01  | 1.61 | 3           | 61.43 | 1.79 |
| >24          | 109         | 52.63# | 2.11 | 49          | 31.50 | 1.90 |

Supplementary Table S3. Geometric means of CK-MB titers in RV-infection and RV-negative children according to age by months. "\*", P<0.05, "#", P<0.01. GM, geometric mean; GSD, geometric standard deviation; RV, rotavirus; CK-MB, Creatine Kinase-MB.

| Age (months) | RV-positive |        |      | RV-negative |        |      |
|--------------|-------------|--------|------|-------------|--------|------|
|              | n           | GM     | GSD  | n           | GM     | GSD  |
| 1            | 7           | 130.82 | 1.87 | 22          | 76.15  | 2.19 |
| 2            | 16          | 103.35 | 2.86 | 47          | 66.79  | 2.17 |
| 3            | 12          | 102.17 | 2.36 | 27          | 80.87  | 2.72 |
| 4            | 11          | 103.54 | 1.79 | 28          | 109.53 | 3.02 |
| 5            | 23          | 114.45 | 2.11 | 35          | 91.94  | 2.11 |
| 6            | 21          | 153.35 | 3.86 | 18          | 95.94  | 3.33 |
| 7            | 24          | 112.58 | 1.78 | 25          | 94.33  | 2.22 |
| 8            | 21          | 116.66 | 3.49 | 24          | 92.49  | 2.69 |
| 9            | 23          | 122.48 | 1.58 | 27          | 85.09  | 2.39 |
| 10           | 35          | 119.78 | 2.64 | 19          | 86.13  | 2.06 |
| 11           | 25          | 115.05 | 1.66 | 22          | 93.61  | 1.74 |
| 12           | 34          | 98.89  | 1.59 | 32          | 111.05 | 3.48 |
| 13           | 23          | 144.44 | 3.79 | 19          | 86.98  | 1.93 |
| 14           | 31          | 136.66 | 2.94 | 25          | 90.32  | 3.27 |
| 15           | 25          | 98.83  | 1.54 | 22          | 99.68  | 2.44 |
| 16           | 32          | 109.54 | 1.98 | 17          | 146.04 | 3.82 |
| 17           | 32          | 156.96 | 2.16 | 13          | 125.55 | 4.87 |
| 18           | 18          | 103.08 | 1.64 | 9           | 103.69 | 2.18 |
| 19           | 12          | 141.08 | 2.01 | 7           | 106.67 | 5.56 |
| 20           | 17          | 134.10 | 2.67 | 9           | 80.17  | 3.12 |
| 21           | 17          | 193.38 | 2.86 | 7           | 116.71 | 1.97 |
| 22           | 7           | 113.14 | 2.21 | 7           | 148.41 | 2.06 |
| 23           | 15          | 115.17 | 2.93 | 6           | 72.67  | 2.46 |
| 24           | 9           | 163.06 | 2.17 | 3           | 175.38 | 2.09 |
| >24          | 109         | 121.87 | 2.49 | 49          | 105.64 | 3.01 |

Supplementary Table S4. Geometric means of CK titers in RV-positive and RV-negative children according to age by months. GM,geometric mean; GSD, geometric standard deviation; RV,rotavirus; CK, Creatine Kinase.

| Onset of diarrhea (days) | RV-positive |        |      | RV-negative |       |      |
|--------------------------|-------------|--------|------|-------------|-------|------|
|                          | n           | GM     | GSD  | n           | GM    | GSD  |
| 1                        | 51          | 46.06* | 2.39 | 42          | 30.56 | 1.80 |
| 2                        | 79          | 76.32# | 1.89 | 80          | 34.52 | 1.89 |
| 3                        | 82          | 77.62# | 1.61 | 72          | 45.93 | 2.09 |
| 4                        | 61          | 76.79# | 1.75 | 60          | 48.29 | 2.84 |
| 5                        | 73          | 68.72# | 2.11 | 68          | 42.33 | 1.97 |
| 6                        | 50          | 64.49# | 1.89 | 56          | 42.64 | 2.42 |
| 7                        | 62          | 60.33# | 2.43 | 70          | 38.76 | 1.74 |
| 8                        | 51          | 42.95# | 2.07 | 44          | 31.02 | 1.92 |
| 9                        | 30          | 37.57  | 1.62 | 26          | 37.02 | 1.93 |
| 10                       | 10          | 57.52  | 2.29 | 32          | 44.71 | 1.89 |
| 11                       | 22          | 53.35  | 2.64 | 19          | 41.45 | 1.82 |
| 12                       | 25          | 30.11  | 1.59 | 30          | 45.97 | 2.09 |
| 13                       | 39          | 28.29  | 1.77 | 21          | 37.85 | 2.23 |
| 14                       | 20          | 36.04  | 2.13 | 19          | 31.99 | 1.43 |
| ≥15                      | 49          | 48.88# | 2.12 | 68          | 30.74 | 1.80 |

Supplementary Table S5. Geometric means of CK-MB titers in RV-positive and RV-negative children according to days after onset of diarrhea. "\*", P<0.05, "#", P<0.01. GM,geometric mean; GSD, geometric standard deviation, RV,rotavirus, CK-MB, Creatine Kinase-MB.

| Onset of diarrhea (days) | RV-positive |         |      | RV-negative |        |      |
|--------------------------|-------------|---------|------|-------------|--------|------|
|                          | n           | GM      | GSD  | n           | GM     | GSD  |
| 1                        | 51          | 87.60   | 2.07 | 42          | 92.18  | 2.19 |
| 2                        | 79          | 120.22  | 1.74 | 80          | 105.20 | 2.65 |
| 3                        | 82          | 124.25  | 1.76 | 72          | 108.63 | 2.83 |
| 4                        | 61          | 119.63  | 1.76 | 60          | 104.70 | 4.55 |
| 5                        | 73          | 116.85# | 1.69 | 68          | 88.42  | 2.14 |
| 6                        | 50          | 108.24  | 1.81 | 56          | 90.74  | 5.03 |
| 7                        | 62          | 83.55   | 1.97 | 70          | 69.09  | 1.81 |
| 8                        | 51          | 84.25   | 1.64 | 44          | 86.13  | 1.93 |
| 9                        | 30          | 69.33   | 1.57 | 26          | 81.38  | 2.53 |
| 10                       | 10          | 76.54*  | 2.48 | 32          | 103.40 | 3.45 |
| 11                       | 22          | 78.44*  | 1.79 | 19          | 107.80 | 3.47 |
| 12                       | 25          | 120.32  | 2.01 | 30          | 101.97 | 2.28 |
| 13                       | 39          | 60.81   | 1.66 | 21          | 87.51  | 4.14 |
| 14                       | 20          | 84.49   | 1.94 | 19          | 82.56  | 2.62 |
| ≥15                      | 49          | 84.25   | 1.83 | 68          | 79.12  | 2.64 |

Supplementary Table S6. Geometric means of CK titers in RV-positive and RV-negative children according to days after onset of diarrhea. "\*", P<0.05, "#", P<0.01.

GM,geometric mean; GSD, geometric standard deviation; RV,rotavirus; CK,Creatine Kinase.

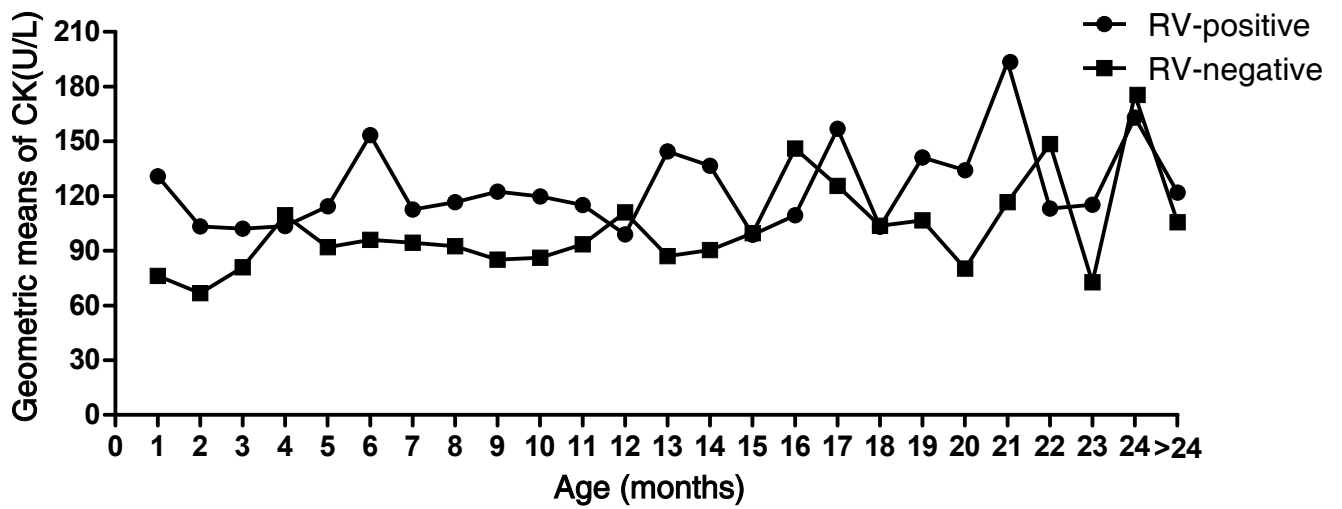

Supplementary Figure S1.Changes of geometric means of CK titers in RV-positive and RV-negative children according to age by months. RV,rotavirus; CK,Creatine Kinase.



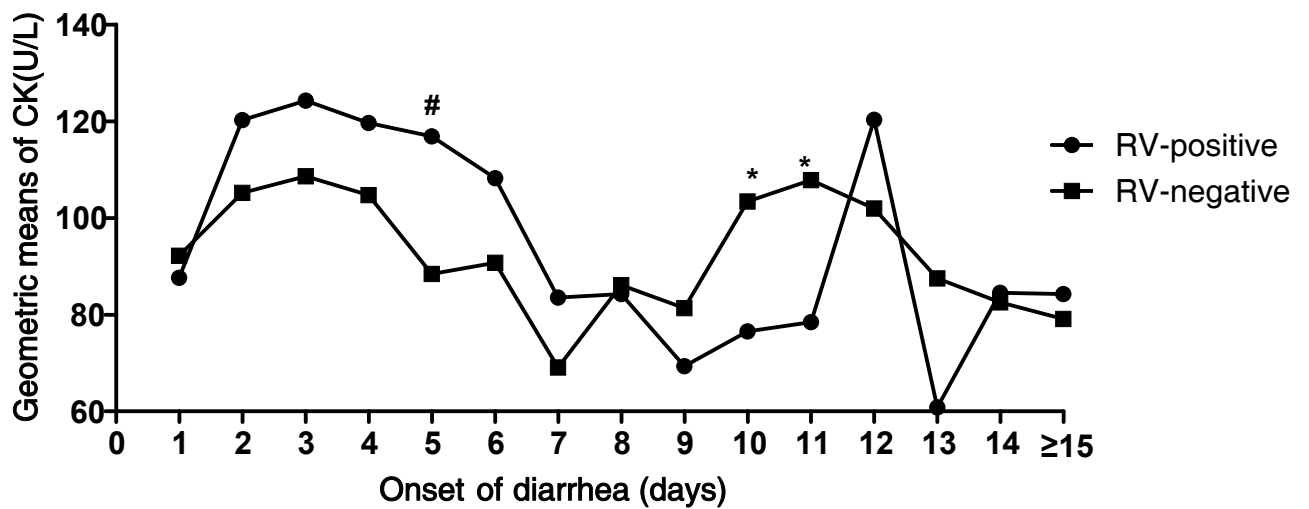

Supplementary Figure S2. Changing patterns of geometric mean of CK titers in RV-positive and RV-negative children according to days after onset of diarrhea. "\*" ,P<0.05,"#" ,P<0.01. RV,rotavirus; CK,Creatine Kinase.

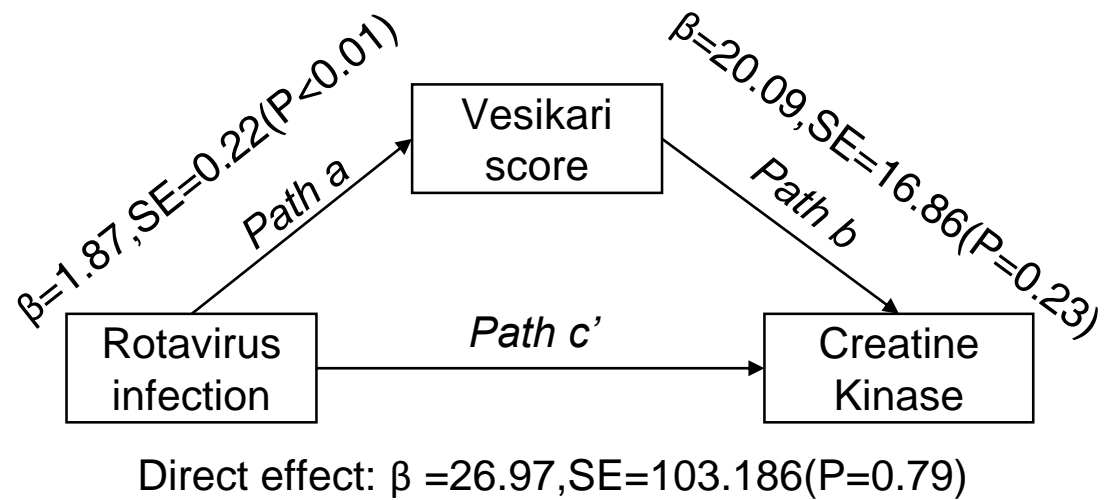

Supplementary Figure S3. Mediation analysis of rotavirus infection and the level of Creatine Kinase.
